# Supplementary material for: Expression Characteristics and Functional Analysis of the ScWRKY3 Gene from Sugarcane
Source: PubMed Central journal article supplement (PMC6321069; doi:10.3390/ijms19124059), 2018-12-14
Supplement: ijms-19-04059-s001.pdf [file ijms-19-04059-s001.pdf]

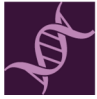

Article

# Expression Characteristics and Functional Analysis of the *ScWRKY3* Gene from Sugarcane

Ling Wang <sup>1</sup>, Feng Liu <sup>1</sup>, Xu Zhang <sup>1</sup>, Wenju Wang <sup>1</sup>, Tingting Sun <sup>1</sup>, Yufeng Chen <sup>1</sup>, Mingjian Dai <sup>1</sup>, Shengxiao Yu <sup>1</sup>, Liping Xu <sup>1,2</sup>, Yachun Su <sup>1,2,\*</sup> and Youxiong Que <sup>1,2,\*</sup>

<sup>1</sup> Key Laboratory of Sugarcane Biology and Genetic Breeding, Ministry of Agriculture, Fujian Agriculture and Forestry University, Fuzhou 350002, China; lingw2017@126.com (L.W.); 18359162091@163.com (F.L.); zahngxuqq7@126.com (X.Z.); wwj1470665850@163.com (W.W.); suntng3221@163.com (T.S.); CYF9410@163.com (Y.C.); 18906071567@163.com (M.D.); dbzq666666@163.com (S.Y.); xlpmail@126.com (L.X.);

<sup>2</sup> Key Laboratory of Ministry of Education for Genetics, Breeding and Multiple Utilization of Crops, College of Crop Science, Fujian Agriculture and Forestry University, Fuzhou 350002, China

\* Correspondence: syc2009mail@163.com, queyouxiong@126.com; Tel.: +86-591-8385-2547

## Supplementary Materials

**Table S1.** Primary structure analysis of *ScWRKY3*

| Primary structure characteristics       | Prediction results |
|-----------------------------------------|--------------------|
| Number of amino acids                   | 236                |
| Molecular weight                        | 25979.45 Da        |
| Theoretical isoelectric point (pI)      | 8.58               |
| Grand average of hydropathicity (GRAVY) | -0.492             |
| The instability index (II)              | 56.08              |

The primary structure of the *ScWRKY3* protein was predicted by ProtParam (<https://web.expasy.org/protparam/>).

Table S2. Primers used in this study

| Primer name        | Primer sequence (5'-3')                                       | Usage                                                                   |
|--------------------|---------------------------------------------------------------|-------------------------------------------------------------------------|
| ScWRKY3-F          | ACCACCACTAACCCCAAAGC                                          | Full length amplification                                               |
| ScWRKY3-R          | CTGCGTCGTCAATGTATGCG                                          | Full length amplification                                               |
| ScWRKY3-QF         | GCGACGTGGATGTACTGGATGA                                        | qRT-PCR analysis                                                        |
| ScWRKY3-QR         | CCTTGGATGGAGGCTGTTCTTG                                        | qRT-PCR analysis                                                        |
| GAPDH-F            | CACGGCCACTGGAAGCA                                             | qRT-PCR analysis                                                        |
| GAPDH-R            | TCCTCAGGGTTCCTGATGCC                                          | qRT-PCR analysis                                                        |
| ScWRKY3-Gate-F     | <u>GGGACAAGTTTGTACAAAAAAGCAGGCTTCAT</u><br>GCAGGCATATATGGAGGG | Gateway entry vector construction<br>and semi-quantitative PCR analysis |
| ScWRKY3-Gate-R     | <u>GGGACCACCTTTGTACAAGAAAGCTGGGTCGAA</u><br>GGAGCTGAAGCAATCGG | Gateway entry vector construction<br>and semi-quantitative PCR analysis |
| ScWRKY4-Gate-F     | <u>GGGACAAGTTTGTACAAAAAAGCAGGCTTCAT</u><br>GGAGGGGAGCAGCCAGCT | Gateway entry vector construction                                       |
| ScWRKY4-Gate-R     | <u>GGGACCACCTTTGTACAAGAAAGCTGGGTCGAG</u><br>CGACGTGAAAGCGCAGC | Gateway entry vector construction                                       |
| ScWRKY3-BD-F       | <u>GGAATTC</u> CATATGATGCAGGCATATATGGAGGG                     | Bait vector construction                                                |
| ScWRKY3-BD-R       | <u>CGGGATCC</u> GAAGGAGCTGAAGCAATCGG                          | Bait vector construction                                                |
| ScWRKY3-AD-F       | <u>GGAATTC</u> CATATGATGCAGGCATATATGGAGGG                     | Prey vector construction                                                |
| ScWRKY3-AD-R       | <u>CGGGATCC</u> GAAGGAGCTGAAGCAATCGG                          | Prey vector construction                                                |
| ScWRKY4-BD-F       | <u>GGAATTC</u> CATATGATGGAGGGGAGCAGCCAGCT                     | Bait vector construction                                                |
| ScWRKY4-BD-R       | <u>CGGGATCC</u> GAGCGACGTGAAAGCGCAGC                          | Bait vector construction                                                |
| ScWRKY4-AD-F       | <u>CCGGAATTC</u> ATGGAGGGGAGCAGCCAGCT                         | Prey vector construction                                                |
| ScWRKY4-AD-R       | <u>CCGCTCG</u> AGGAGCGACGTGAAAGCGCAGC                         | Prey vector construction                                                |
| NtH201-F           | CAGCAGTCCTTTGGCGTTGTC                                         | qRT-PCR analysis                                                        |
| NtH201-R           | GCTCAGTTTAGCCGCAGTTGTG                                        | qRT-PCR analysis                                                        |
| NtH203-F           | TGGCTCAACGATTACGCA                                            | qRT-PCR analysis                                                        |
| NtH203-R           | GCACGAAACCTGGATGG                                             | qRT-PCR analysis                                                        |
| NtH515-F           | TTGGGCAGAATAGATGGGTA                                          | qRT-PCR analysis                                                        |
| NtH515-R           | TTTGGTGAAAGTCTTGCTC                                           | qRT-PCR analysis                                                        |
| NtNPR1-F           | GGCGAGGAGTCCGTTCTTTAA                                         | qRT-PCR analysis                                                        |
| NtNPR1-R           | TCAACCAGGAATGCCACAGC                                          | qRT-PCR analysis                                                        |
| NtPR1a/c-F         | AACCTTTGACCTGGGACGAC                                          | qRT-PCR analysis                                                        |
| NtPR1a/c-R         | GCACATCCAACACGAACCGA                                          | qRT-PCR analysis                                                        |
| NtPR2-F            | TGATGCCCTTTTGGATTCTATG                                        | qRT-PCR analysis                                                        |
| NtPR2-R            | AGTTCCTGCCCCGCTTT                                             | qRT-PCR analysis                                                        |
| NtPR3-F            | CAGGAGGGTATTGCTTTGTTAGG                                       | qRT-PCR analysis                                                        |
| NtPR3-R            | CGTGGGAAGATGGCTTGTTGTC                                        | qRT-PCR analysis                                                        |
| NtEFE26-F          | CGGACGCTGGTGGCATAAT                                           | qRT-PCR analysis                                                        |
| NtEFE26-R          | CAACAAGAGCTGGTGCTGGATA                                        | qRT-PCR analysis                                                        |
| NtAccdeaminase-F   | TCTGAGGTTACTGATTTGGATTGG                                      | qRT-PCR analysis                                                        |
| NtAccdeaminase-R   | TGGACATGGTGGATAGTTGCT                                         | qRT-PCR analysis                                                        |
| NtEF-1 $\alpha$ -F | TGCTGCTGTAACAAGATGGATGC                                       | qRT-PCR analysis                                                        |
| NtEF-1 $\alpha$ -R | GAGATGGGGACAAAGGGGATT                                         | qRT-PCR analysis                                                        |

*attB1* and *attB2* adapters are underlined in the forward primers and in the reverse primers for gateway entry vector construction, respectively. The added restriction enzyme sites of *EcoR* I (GAATTC), *Xho* I (CTCGAG), *Nde* I (CATATG)

and *Bam*H I (GGATCC) are underlined in the primers for bait or prey vectors construction, and the double underlined areas in these primers indicate protective bases.

**Table S3.** Raw calculations of tissue-specific expression of *ScWRKY3* in different 10-month-old ROC22 tissues by qRT-PCR

| <b>Tissues</b> | <b>2<sup>-ΔΔC<sub>T</sub></sup></b> | <b>Standard error</b> |
|----------------|-------------------------------------|-----------------------|
| R              | 1.02874                             | 0.17959               |
| B              | 4.70889                             | 1.64113               |
| L              | 1.13441                             | 0.35043               |
| SP             | 29.17377                            | 4.75581               |
| SE             | 2.50973                             | 0.36618               |

The tissues (root, bud, leaf, stem pith, and stem epidermis) are represented by R, B, L, SP, and SE, respectively. Data are normalized to the glyceraldehyde-3-phosphate dehydrogenase (*GAPDH*) expression level. All data points are means ± standard error (*n* = 3). Bars superscripted by different lowercase letters indicate significant differences, as determined by Duncan's new multiple range test (p-value < 0.05).

**Table S4.** Raw calculations of gene expression patterns of *ScWRKY3* in 4-month-old ROC22 plantlets under abiotic stress

| <b>Treatment time</b> | <b>NaCl</b>                         |                       | <b>PEG</b>                          |                       |
|-----------------------|-------------------------------------|-----------------------|-------------------------------------|-----------------------|
|                       | <b>2<sup>-ΔΔC<sub>T</sub></sup></b> | <b>Standard error</b> | <b>2<sup>-ΔΔC<sub>T</sub></sup></b> | <b>Standard error</b> |
| 0 h                   | 1.02248                             | 0.15162               | 1.00235                             | 0.04850               |
| 0.5 h                 | 1.12695                             | 0.03042               | 0.67118                             | 0.05745               |
| 3 h                   | 1.10801                             | 0.06703               | 38.57182                            | 10.9277               |
| 6 h                   | 0.63938                             | 0.08744               | 1.27614                             | 0.22401               |
| 24 h                  | 3.27612                             | 0.26971               | 1.11389                             | 0.12550               |

NaCl, sodium chloride (simulating salt stress) (250 mM); PEG, polyethylene glycol (simulating drought treatment) (25.0%). Data are normalized to the glyceraldehyde-3-phosphate dehydrogenase (*GAPDH*) expression level. All data points are means ± standard error (*n* = 3). Bars superscripted by different lowercase letters indicate significant differences, as determined by Duncan's new multiple range test (p-value < 0.05).

**Table S5.** Raw calculations of gene expression of *ScWRKY3* in 4-month-old ROC22 plantlets under plant hormone stress

| <b>Treatment time</b> | <b>SA</b>                           |                       | <b>MeJA</b>                         |                       | <b>ABA</b>                          |                       |
|-----------------------|-------------------------------------|-----------------------|-------------------------------------|-----------------------|-------------------------------------|-----------------------|
|                       | <b>2<sup>-ΔΔC<sub>T</sub></sup></b> | <b>Standard error</b> | <b>2<sup>-ΔΔC<sub>T</sub></sup></b> | <b>Standard error</b> | <b>2<sup>-ΔΔC<sub>T</sub></sup></b> | <b>Standard error</b> |
| 0 h                   | 1.00130                             | 0.00001               | 1.00217                             | 0.00011               | 1.00515                             | 0.08640               |
| 3 h                   | 0.39460                             | 0.01486               | 0.55133                             | 0.00048               | 0.80955                             | 0.04149               |
| 6 h                   | 0.59523                             | 0.10924               | 0.42110                             | 0.05784               | 1.66832                             | 0.15545               |
| 24 h                  | 0.49914                             | 0.00962               | 0.33474                             | 0.08544               | 0.80563                             | 0.11352               |

SA, salicylic acid (5 mM); MeJA, methyl jasmonate (25 μM); ABA, abscisic acid (100 μM). Data are normalized to the glyceraldehyde-3-phosphate dehydrogenase (*GAPDH*) expression level. All data points are means ± standard error (*n* = 3). Bars superscripted by different lowercase letters indicate significant differences, as determined by Duncan's new multiple range test (p-value < 0.05).

**Table S6.** Raw calculations of expression of the *ScWRKY3* gene after infection with smut pathogen

| Treatment time | Yacheng05-179           |                | ROC22                   |                |
|----------------|-------------------------|----------------|-------------------------|----------------|
|                | $2^{-\Delta\Delta C_T}$ | Standard error | $2^{-\Delta\Delta C_T}$ | Standard error |
| 0 h            | 1.02011                 | 0.25922        | 1.00740                 | 0.08826        |
| 24 h           | 1.26167                 | 0.47474        | 0.50795                 | 0.06088        |
| 48 h           | 1.13023                 | 0.09219        | 0.95991                 | 0.00450        |
| 72 h           | 1.05532                 | 0.10303        | 0.79783                 | 0.03618        |

Yacheng05-179 is a smut-resistant *Saccharum* hybrid cultivar, and ROC22 is a smut-susceptible *Saccharum* hybrid cultivar. Data are normalized to the glyceraldehyde-3-phosphate dehydrogenase (*GAPDH*) expression level. All data points are means  $\pm$  standard error ( $n = 3$ ). Bars superscripted by different lowercase letters indicate significant differences, as determined by Duncan's new multiple range test (p-value < 0.05).

**Table S7.** Raw calculations of the transcript level of nine immunity-associated marker genes in the *Nicotiana benthamiana* leaves after one day of agroinfiltration

| Gene name             | 35::00                  |                | 35::ScWRKY3             |                |
|-----------------------|-------------------------|----------------|-------------------------|----------------|
|                       | $2^{-\Delta\Delta C_T}$ | Standard error | $2^{-\Delta\Delta C_T}$ | Standard error |
| <i>NtHSR201</i>       | 1.00035                 | 0.01878        | 0.31325                 | 0.01010        |
| <i>NtHSR203</i>       | 1.02856                 | 0.16092        | 5.55995                 | 0.26401        |
| <i>NtHSR515</i>       | 1.01574                 | 0.12341        | 3.05449                 | 0.03158        |
| <i>NtPR1</i>          | 1.02067                 | 0.15147        | 14.15632                | 0.80030        |
| <i>NtPR-1a/c</i>      | 1.00025                 | 0.01561        | 0.83799                 | 0.01543        |
| <i>NtPR2</i>          | 1.00014                 | 0.01178        | 0.99941                 | 0.02160        |
| <i>NtPR3</i>          | 1.00096                 | 0.03072        | 8.79463                 | 0.34939        |
| <i>NtEFE26</i>        | 1.00027                 | 0.01638        | 1.46628                 | 0.01135        |
| <i>NtAccdeaminase</i> | 1.00442                 | 0.06553        | 2.35996                 | 0.06627        |

Data are normalized to the *NtEF-1 $\alpha$*  expression level. All data points are means  $\pm$  standard error ( $n = 3$ ). Bars superscripted by different lowercase letters indicate significant differences, as determined by Duncan's new multiple range test (p-value < 0.05).

**Table S8.** Raw calculations of the transcripts of nine immunity-associated marker genes in the *Nicotiana benthamiana* leaves after inoculation with *Ralstonia solanacearum* for one day and seven days

| Gene name             | Treatment time | 35::00                        |                | 35::ScWRKY3                   |                |
|-----------------------|----------------|-------------------------------|----------------|-------------------------------|----------------|
|                       |                | 2 <sup>-ΔΔC<sub>T</sub></sup> | Standard error | 2 <sup>-ΔΔC<sub>T</sub></sup> | Standard error |
| <i>NtH201</i>         | 0 d            | 1.00035                       | 0.01878        | 1.03671                       | 0.18533        |
|                       | 1 d            | 23.83326                      | 0.44415        | 1.00248                       | 0.05525        |
|                       | 7 d            | 21.64681                      | 0.79454        | 1.00289                       | 0.04423        |
| <i>NtH203</i>         | 0 d            | 1.02856                       | 0.16092        | 1.00226                       | 0.04759        |
|                       | 1 d            | 8.47359                       | 0.08132        | 2.51027                       | 0.04509        |
|                       | 7 d            | 1.13105                       | 0.03165        | 3.32439                       | 0.10266        |
| <i>NtH515</i>         | 0 d            | 1.01574                       | 0.12341        | 1.00011                       | 0.01034        |
|                       | 1 d            | 23.12115                      | 0.75118        | 2.70385                       | 0.15356        |
|                       | 7 d            | 7.13494                       | 0.12217        | 2.65545                       | 0.04517        |
| <i>NtNPR1</i>         | 0 d            | 1.02067                       | 0.15147        | 1.00310                       | 0.05671        |
|                       | 1 d            | 48.32176                      | 3.78460        | 24.73383                      | 3.91994        |
|                       | 7 d            | 26.22899                      | 0.03695        | 12.70940                      | 1.69010        |
| <i>NtPR1a/c</i>       | 0 d            | 1.00025                       | 0.01561        | 1.00087                       | 0.02918        |
|                       | 1 d            | 2.69564                       | 0.19104        | 2.23772                       | 0.04028        |
|                       | 7 d            | 7.34399                       | 0.43130        | 1.03147                       | 0.03602        |
| <i>NtPR2</i>          | 0 d            | 1.00014                       | 0.01178        | 1.43645                       | 0.85614        |
|                       | 1 d            | 0.00540                       | 0.00130        | 0.00003                       | 0.00001        |
|                       | 7 d            | 6.91943                       | 1.35432        | 5.07464                       | 0.76171        |
| <i>NtPR3</i>          | 0 d            | 1.00096                       | 0.03072        | 1.00158                       | 0.03979        |
|                       | 1 d            | 1.17475                       | 0.02933        | 0.78957                       | 0.29541        |
|                       | 7 d            | 4.22494                       | 0.65946        | 1.95949                       | 0.16057        |
| <i>NtEFE26</i>        | 0 d            | 1.00027                       | 0.01638        | 1.00006                       | 0.00774        |
|                       | 1 d            | 0.80520                       | 0.01612        | 0.29558                       | 0.00401        |
|                       | 7 d            | 0.20565                       | 0.00213        | 0.07477                       | 0.00183        |
| <i>NtAccdeaminase</i> | 0 d            | 1.00442                       | 0.06553        | 1.00078                       | 0.02811        |
|                       | 1 d            | 0.60119                       | 0.01118        | 0.63861                       | 0.02083        |
|                       | 7 d            | 0.29504                       | 0.01311        | 0.63590                       | 0.00549        |

Data are normalized to the *NtEF-1α* expression level. All data points are means ± standard error ( $n = 3$ ). Bars superscripted by different lowercase letters indicate significant differences, as determined by Duncan's new multiple range test ( $p$ -value < 0.05).

**Table S9.** Raw calculations of the transcripts of nine immunity-associated marker genes in the *Nicotiana benthamiana* leaves after inoculation with *Fusarium solani* var. *coeruleum* for one day and seven days

| Gene name            | Treatment time | 35::00                        |                | 35::ScWRKY3                   |                |
|----------------------|----------------|-------------------------------|----------------|-------------------------------|----------------|
|                      |                | 2 <sup>-ΔΔC<sub>T</sub></sup> | Standard error | 2 <sup>-ΔΔC<sub>T</sub></sup> | Standard error |
| <i>NtH201</i>        | 0 d            | 1.00195                       | 0.04430        | 1.00045                       | 0.02137        |
|                      | 1 d            | 0.27135                       | 0.01817        | 0.53091                       | 0.01105        |
|                      | 7 d            | 0.05003                       | 0.00352        | 0.14749                       | 0.00262        |
| <i>NtH203</i>        | 0 d            | 1.00208                       | 0.04575        | 1.00036                       | 0.01894        |
|                      | 1 d            | 0.67138                       | 0.03458        | 0.42983                       | 0.03520        |
|                      | 7 d            | 0.11990                       | 0.00492        | 0.26738                       | 0.00426        |
| <i>NtH515</i>        | 0 d            | 1.01527                       | 0.11926        | 1.02883                       | 0.16165        |
|                      | 1 d            | 13.54125                      | 0.28097        | 0.00261                       | 0.00001        |
|                      | 7 d            | 1.19530                       | 0.00971        | 0.00024                       | 0.00002        |
| <i>NtNPR1</i>        | 0 d            | 1.00195                       | 0.05101        | 1.02043                       | 0.16589        |
|                      | 1 d            | 6.91331                       | 0.45229        | 1.99066                       | 0.30924        |
|                      | 7 d            | 3.44026                       | 0.03078        | 0.20613                       | 0.02542        |
| <i>NtPR1a/c</i>      | 0 d            | 1.00025                       | 0.01561        | 1.00054                       | 0.02319        |
|                      | 1 d            | 0.22801                       | 0.04156        | 0.10524                       | 0.00300        |
|                      | 7 d            | 0.99548                       | 0.02271        | 0.27953                       | 0.00774        |
| <i>NtPR2</i>         | 0 d            | 1.00542                       | 0.07383        | 1.02190                       | 0.14310        |
|                      | 1 d            | 1.40590                       | 0.24153        | 1.22961                       | 0.13109        |
|                      | 7 d            | 0.04811                       | 0.00295        | 0.64970                       | 0.12044        |
| <i>NtPR3</i>         | 0 d            | 1.00096                       | 0.03072        | 1.00158                       | 0.03979        |
|                      | 1 d            | 0.04353                       | 0.00743        | 0.27462                       | 0.03474        |
|                      | 7 d            | 0.80819                       | 0.09846        | 2.35022                       | 0.14629        |
| <i>NtEFE26</i>       | 0 d            | 1.00077                       | 0.02752        | 1.00006                       | 0.00774        |
|                      | 1 d            | 0.00036                       | 0.00002        | 0.00126                       | 0.00006        |
|                      | 7 d            | 0.00021                       | 0.02002        | 0.00032                       | 0.00004        |
| <i>NtAcdeaminase</i> | 0 d            | 1.00442                       | 0.06553        | 1.00078                       | 0.02811        |
|                      | 1 d            | 0.13969                       | 0.03101        | 1.68063                       | 0.04270        |
|                      | 7 d            | 0.04792                       | 0.00090        | 0.15812                       | 0.03980        |

Data are normalized to the *NtEF-1α* expression level. All data points are means ± standard error ( $n = 3$ ). Bars superscripted by different lowercase letters indicate significant differences, as determined by Duncan's new multiple range test ( $p$ -value < 0.05).

|                  |                                                                                      |     |
|------------------|--------------------------------------------------------------------------------------|-----|
| ROC22-ScWRKY3    | ACCACCACTAACCCCAAAGCATCATCGTCATCGTCAACCTTATCGTGCACAGTTATTGACACCAAAAGGAGAGAGATGCA     | 80  |
| YC05-179-ScWRKY3 | ACCACCACTAACCCCAAAGCATCATCGTCATCGTCAACCTTATCGTGCACAGTTATTGACACCAAAAGGAGAGAGATGCA     | 80  |
| Consensus        | accaccactaaccccaaaagcatcatcgtcacaccttatcgtgcacagttattgacaccaaaaggagagagatgca         |     |
| ROC22-ScWRKY3    | TTCCGATCCATCCTGCGAATTTTCTGCCCGGCGCCCAACCAAGATCCACACTTTGATCATCAATCGATCGTAGCGCA        | 160 |
| YC05-179-ScWRKY3 | TTCCGATCCATCCTGCGAATTTTCTGCCCGGCGCCCAACCAAGATCCACACTTTGATCATCAATCGATCGTAGCGCA        | 160 |
| Consensus        | tccgatccatcctgcaattttctgcccggcgcccaaccaagatccacactttgatcatcaatcgatcgtagcgca          |     |
| ROC22-ScWRKY3    | TATGAGGCGATATATGGAGGGAGGCGAGTTGAGTGTTCCTTCCCTAGCTTCCCTTGTGCCGGATCACTACGCCGGCTTCC     | 240 |
| YC05-179-ScWRKY3 | TATGAGGCGATATATGGAGGGAGGCGAGTTGAGTGTTCCTTCCCTAGCTTCCCTTGTGCCGGATCACTACGCCGGCTTCC     | 240 |
| Consensus        | tatgagggcagatataatggagggagggcagttgagtgcttgccttcctagcttcccttgtgccggatcactacgccggcttcc |     |
| ROC22-ScWRKY3    | CCCTTCCTCCTCCGCTACAACCTTCTAGCCAACCAACAACAAGCTTTTCAGATGCGGTTTGTAGTTAACAGGAAGAG        | 320 |
| YC05-179-ScWRKY3 | CCCTTCCTCCTCCGCTACAACCTTCTAGCCAACCAACAACAAGCTTTTCAGATGCGGTTTGTAGTTAACAGGAAGAG        | 320 |
| Consensus        | cccttcctcctccgctacaacttctagccaaccaacaacaagcttttcagatgccggttgtagttaacaggaagag         |     |
| ROC22-ScWRKY3    | ACAGAGAACCATGGCGCATGCTCTCCTCCGACCATTTGTGTGGACTATACCCTGCTGCCGGCACTGCCCTTCGGCAGCTG     | 400 |
| YC05-179-ScWRKY3 | ACAGAGAACCATGGCGCATGCTCTCCTCCGACCATTTGTGTGGACTATACCCTGCTGCCGGCACTGCCCTTCGGCAGCTG     | 400 |
| Consensus        | acagagaaccatggcggcatgctctcctccgaccattgtgtggactataaccctgctgccggcactgcccttcggcagctg    |     |
| ROC22-ScWRKY3    | CTCCGGCGCGCGCGCGCAACAGCATGCGGTGGGAAGCCGACGGCCGGTTTCATGCCAGTGCTATTGGCGCTGAGGAGG       | 480 |
| YC05-179-ScWRKY3 | CTCCGGCGCGCGCGCGCAACAGCATGCGGTGGGAAGCCGACGGCCGGTTTCATGCCAGTGCTATTGGCGCTGAGGAGG       | 480 |
| Consensus        | ctccggcgccgcccggcaacagcatgcggtgggaagccgacggccggtttcacgcccagtgctattggcgctgaggagg      |     |
| ROC22-ScWRKY3    | TCTGCACCTCGGTGGCTACTAACTAGGTTGCAACGAGAGTAATAGCACATGGTGGAAAGGCTCAGCAGCTACGACTGCC      | 560 |
| YC05-179-ScWRKY3 | TCTGCACCTCGGTGGCTACTAACTAGGTTGCAACGAGAGTAATAGCACATGGTGGAAAGGCTCAGCAGCTACGACTGCC      | 560 |
| Consensus        | tctgcacctcgggtggctactaaactagggtgcaacgagagtaatagcacatggtggaaggctcagcagctacgactgcc     |     |
| ROC22-ScWRKY3    | GAGAGAGGGAAGATGAAGGTGAGGAGGAAGATGAGGGAACCGAGGTTTTGCTTCCAGACCAGAAGCGACGTGGATGTACT     | 640 |
| YC05-179-ScWRKY3 | GAGAGAGGGAAGATGAAGGTGAGGAGGAAGATGAGGGAACCGAGGTTTTGCTTCCAGACCAGAAGCGACGTGGATGTACT     | 640 |
| Consensus        | gagagaggggaagatgaaggtgaggaggaagatgagggaaaccgaggttttgcttccagaccagaagcgacgtggatgtact   |     |
| ROC22-ScWRKY3    | GGATGATGGCTACAAGTGGAGGAAGTACGGGCAGAAGTTGTCAAGAACAGCCTCCATCCAAGGAGCTATTTCCGGTGC       | 720 |
| YC05-179-ScWRKY3 | GGATGATGGCTACAAGTGGAGGAAGTACGGGCAGAAGTTGTCAAGAACAGCCTCCATCCAAGGAGCTATTTCCGGTGC       | 720 |
| Consensus        | ggatgatggctacaagtggaggaagtacgggcagaagttgtcaagaacagcctccatccaaggagctatttccgggtgca     |     |
| ROC22-ScWRKY3    | CTCACAGCAACTGCCGCGTGAAGAAAACGGGTGGAGCGGCTGTTCGACGGACTGCCGCATGGTGATGACCACGTACGAGGGC   | 800 |
| YC05-179-ScWRKY3 | CTCACAGCAACTGCCGCGTGAAGAAAACGGGTGGAGCGGCTGTTCGACGGACTGCCGCATGGTGATGACCACGTACGAGGGC   | 800 |
| Consensus        | ctcacagcaactgccgctgaagaaaacgggtggagcggctgttcgacggactgccgcacgtgacacgtacgagggc         |     |
| ROC22-ScWRKY3    | CGCCACACGCACCTCCTCCTGCAGCGACGACGCTTCCCTCCGCGACACACCGATTGCTTCAGCTCCTTCTGAATCTATCT     | 880 |
| YC05-179-ScWRKY3 | CGCCACACGCACCTCCTCCTGCAGCGACGACGCTTCCCTCCGCGACACACCGATTGCTTCAGCTCCTTCTGAATCTATCT     | 880 |
| Consensus        | cgccacacgcactcctcctgcagcgcacgcgcttccctccgcccacacaccgattgcttcagctccttctgaatctatct     |     |
| ROC22-ScWRKY3    | ATCCACGACCGCATAACATTGACGACGCGAG                                                      | 910 |
| YC05-179-ScWRKY3 | ATCCACGACCGCATAACATTGACGACGCGAG                                                      | 910 |
| Consensus        | atcccacgaccgcataacattgacgacgcag                                                      |     |

**Figure S1.** Nucleic acid sequences alignment of ScWRKY3 in ROC22 and Yacheng05-179. The black color indicates the homology level of conservation of the nucleic acid sequences in the alignment at 100%.

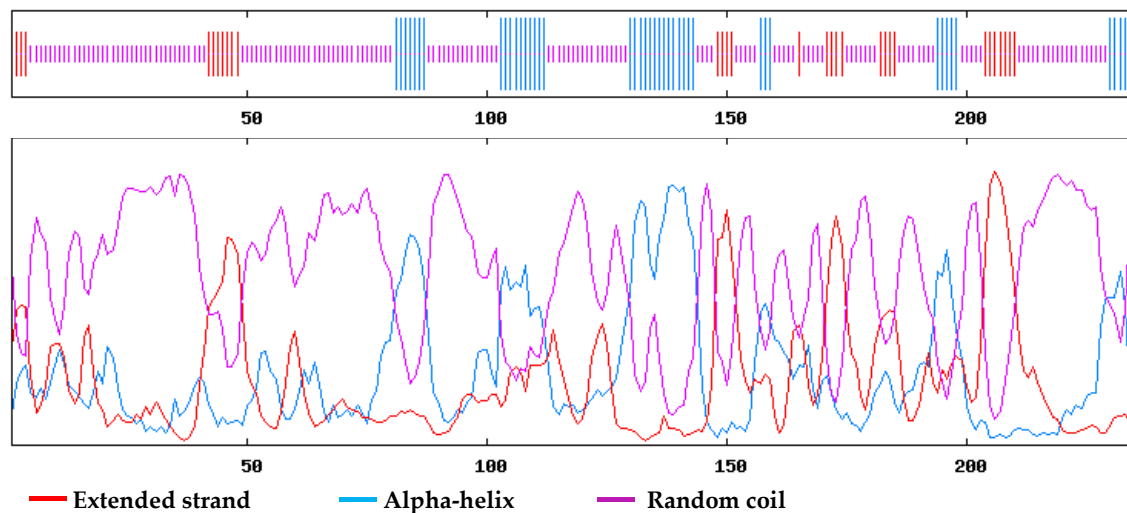

**Figure S2.** Secondary structure prediction of ScWRKY3. NPS@ server ([https://npsa-prabi.ibcp.fr/cgi-bin/npsa\\_automat.pl?page=/NPSA/npsa\\_hnn.html](https://npsa-prabi.ibcp.fr/cgi-bin/npsa_automat.pl?page=/NPSA/npsa_hnn.html)) is used to predict this structure.

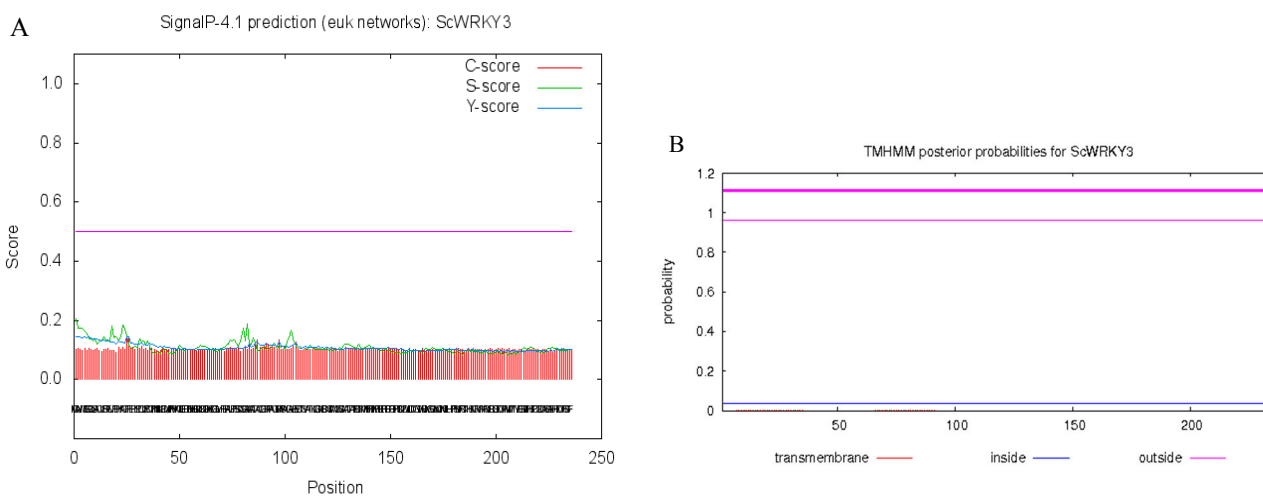

**Figure S3.** Signal peptide and transmembrane domain prediction of ScWRKY3. (A) SignalP 4.1 Server (<http://www.cbs.dtu.dk/services/SignalP/>) is used to predict the signal peptide of ScWRKY3. (B) TMHMM Server v. 2.0 (<http://www.cbs.dtu.dk/services/TMHMM/>) is used to predict the transmembrane domain of ScWRKY3.



**Euk-mPLoc 2.0: Predicting subcellular localization of eukaryotic proteins including those with multiple sites**  
| [Read Me](#) | [Data](#) | [Citation](#) |

Your input sequence (236aa) is:

```
>ScWRKY3
MQAYMEGGQLSACLPSFLVPDHYAGFPLPLQLPSQPNNKLFQMPFVVNQEETENHGGM
LSSDHCGLYPLPALPFGSCGAAAATACGGKPTAGFMPAIGAEVCTSVATKLGCSNES
NSTWVKGSAAATTAERGKMKVRRKMRPRFCQTRSDVDVLDGKWKYQKVVKNLSLHP
RSYFRCTHSNCRVKKRVERLSTDCRMVMTTYEGRHHSPCSDASSADHTDCFSSF
```

----- Euk-mPLoc 2.0 Computation Result -----

| Query protein | Predicted location(s) |
|---------------|-----------------------|
| ScWRKY3       | <b>Nucleus.</b>       |

[Home Page](#)

Contact @ [Hong-Bin](#)

**Figure S4.** Subcellular localization prediction of ScWRKY3. Euk-mPLoc 2.0 Server (<http://www.csbio.sjtu.edu.cn/bioinf/euk-multi-2/>) is used to predict the subcellular localization of ScWRKY3.

|          |           |                                                                                                          |     |
|----------|-----------|----------------------------------------------------------------------------------------------------------|-----|
| <b>A</b> | ScWRKY3   | MQAYMEGGQLSACLPSFLVDPHYA...FPLPLPLQLPSQPNKLFQMPFV...NOE...ETENHGG...MLSSDHCGGLYPLPALPFGSCSGAA...AA       | 86  |
|          | SbWRKY57  | MQAYMEGGQLSACLPSFLVDPHYA...FPLPLPLQLPSSO...NKLQMPFV...DQAE...TENHGG...GLSSDHCG...LYPLPALPFGSCSGAACAA     | 87  |
|          | Consensus | mqaymeggqlsacpflvpdhyagfplplplqlpsqpnklfqmpfvvdqeaetenhgggmlssdhcgglyplpalpfgscsgaagaa                   |     |
|          | ScWRKY3   | TACGGKPTAGFMPSAIGAEVCTSVATKLGCSNESNSTWKGSAATT...AERGMKMKVRRKMRPRFCFQTRSDVDVLDGGYKWRKYGQKVVK              | 175 |
|          | SbWRKY57  | TACGGKPTAGFMPSAIGAEVCTSVATKLGCSNESNSTWKGSAATT...AERGMKMKVRRKMRPRFCFQTRSDVDVLDGGYKWRKYGQKVVK              | 177 |
|          | Consensus | tacggkptagfmpsaigaeevctsvatklgcsnesnstwkgsaattiaergkmkvrkrmreprfcfqt rsdvldvlddgykwrkygqkvk              |     |
|          | ScWRKY3   | NSLHPRSFRCTHSNCRVKKRVERLSTDCRMVMTTYEGRHTHSPCSDDASSADHTDCFSS                                              | 236 |
|          | SbWRKY57  | NSLHPRSFRCTHSNCRVKKRVERLSTDCRMVMTTYEGRHTHSPCSDDASSADHTDCFSS                                              | 238 |
|          | Consensus | nslhprsyfrcthsncrvkkvrerlstdcrmvmttyegrhthspcsddassadhtdcfssf                                            |     |
| <b>B</b> | ScWRKY3   | MQAYMEGGQLSACLPSFLVDPHYA...FPLPLPLQLPSQPNKLFQMPFV...NOE...TENHGGMLSSDHCGGLYPLPALPFGSCSGAA...ATAACG       | 90  |
|          | MlWRKY12  | ...MEGGQLSACLPSFLVDPHYA...FPLPLPLQLPSQPNKLFQMPFV...DQAE...TENHGGMLSSDHCGGLYPLPALPFGSSGAATATAACG          | 86  |
|          | Consensus | mqaymeggqlsacpflvpdhyagfplplplqlpsqpnklfqmpfvvdqeaetenhggmlssdhcgglyplpalpfgscsgaaaatac                  |     |
|          | ScWRKY3   | GKPTAGFMPSTIGAEVCTSVATKLGCSNESNSTWKGSAATT...AERGMKMKVRRKMRPRFCFQTRSDVDVLDGGYKWRKYGQKVVKNSLH              | 179 |
|          | MlWRKY12  | GKPTAGFMPSTIGAEVCTSVATKLGCSNESNSTWKGSAATT...AERGMKMKVRRKMRPRFCFQTRSDVDVLDGGYKWRKYGQKVVKNSLH              | 176 |
|          | Consensus | gkptagfmpsaigaeevctsvatklgcsnesnstwkgsaattiaergkmkvrkrmreprfcfqt rsdvldvlddgykwrkygqkvknslh              |     |
|          | ScWRKY3   | PRSYFRCTHSNCRVKKRVERLSTDCRMVMTTYEGRHTHSPCSDDASSADHTDCFSS                                                 | 236 |
|          | MlWRKY12  | PRSYFRCTHSNCRVKKRVERLSTDCRMVMTTYEGRHTHSPCSDDASSADHTDCFSS                                                 | 233 |
|          | Consensus | prsyfrcthsncrvkkvrerlstdcrmvmttyegrhthspcsddassadhtdcfssf                                                |     |
| <b>C</b> | ScWRKY3   | MQAYMEGGQLSACLPSFLVDPHYA...FPLPLPLQLPSQPNKLFQMPFV...NOE...TENHGGMLSSDHCGGLYPLPALPFGSCSGAA...ATAACG       | 87  |
|          | ZmWRKY51  | MQAYMEGGQLSACLPSFLVDPHYA...FPLPLPLQLPSQPNKLFQMPFV...DQAE...TENHGGMLSSDHCGGLYPLPALPFGSCSGAA...ATAACG      | 85  |
|          | Consensus | mqaymeggqlsacpflvpdhyagfplplplqlpsqpnklfqmpfvvdqeaetenhggmlssdhcgglyplpalpfgscsgaaaatac                  |     |
|          | ScWRKY3   | ACCGKPTAGFMPSTIGAEVCTSVATKLGCSNESNSTWKGSAATT...AERGMKMKVRRKMRPRFCFQTRSDVDVLDGGYKWRKYGQKVVK               | 176 |
|          | ZmWRKY51  | A...KPTAGFMPSTIGAEVCTSVATKLGCSNESNSTWKGSAATT...AERGMKMKVRRKMRPRFCFQTRSDVDVLDGGYKWRKYGQKVVK               | 171 |
|          | Consensus | acggkptagfmpsaigaeevctsvatklgcsnesnstwkgsaattiaergkmkvrkrmreprfcfqt rsdvldvlddgykwrkygqkvk               |     |
|          | ScWRKY3   | SLHPRSFRCTHSNCRVKKRVERLSTDCRMVMTTYEGRHTHSPCSDDASSADHTDCFSS                                               | 236 |
|          | ZmWRKY51  | SLHPRSFRCTHSNCRVKKRVERLSTDCRMVMTTYEGRHTHSPCSDDASSADHTDCFSS                                               | 231 |
|          | Consensus | slhprsyfrcthsncrvkkvrerlstdcrmvmttyegrhthspcsddassadhtdcfssf                                             |     |
| <b>D</b> | ScWRKY3   | MQAYMEGGQLSACLPSFLVDPHYA...FPLPLPLQLPSQPNKLFQMPFV...NOE...TENHGGMLSSDHCGGLYPLPALPFGSCSGAA...ATAACG       | 90  |
|          | SiWRKY12  | MQAYMEGGQLSACLPSFLVDPHYA...FPLPLPLQLPSSO...NKLQMPFV...DQAE...TENHGGMLSSDHCGGLYPLPALPFGSCSGAA...ATAACG    | 84  |
|          | Consensus | mqaymeggqlsacpflvpdhyagfplplplqlpsqpnklfqmpfvvdqeaetenhggmlssdhcgglyplpalpfgscsgaaaatac                  |     |
|          | ScWRKY3   | GKPTAGFMPSTIGAEVCTSVATKLGCSNESNSTWKGSAATT...AERGMKMKVRRKMRPRFCFQTRSDVDVLDGGYKWRKYGQKVVKNSLH              | 180 |
|          | SiWRKY12  | GKPTAGFMPSTIGAEVCTSVATKLGCSNESNSTWKGSAATT...AERGMKMKVRRKMRPRFCFQTRSDVDVLDGGYKWRKYGQKVVKNSLH              | 172 |
|          | Consensus | gkptagfmpsaigaeevctsvatklgcsnesnstwkgsaattiaergkmkvrkrmreprfcfqt rsdvldvlddgykwrkygqkvknslh              |     |
|          | ScWRKY3   | RSYFRCTHSNCRVKKRVERLSTDCRMVMTTYEGRHTHSPCSDDASSADHTDCFSS                                                  | 236 |
|          | SiWRKY12  | RSYFRCTHSNCRVKKRVERLSTDCRMVMTTYEGRHTHSPCSDDASSADHTDCFSS                                                  | 228 |
|          | Consensus | rsyfrcthsncrvkkvrerlstdcrmvmttyegrhthspcsddassadhtdcfssf                                                 |     |
| <b>E</b> | ScWRKY3   | MQAYMEGGQLSACLPSFLVDPHYA...FPLPLPLQLPSQPNKLFQMPFV...NOE...TENHGGMLSSDHCGGLYPLPALPFGSCSGAA...ATAACG       | 89  |
|          | OsWRKY12  | MHTMEGGQLSACLPSFLVDPHYA...FPLPLPLQLPCHP...KLLQMPFV...DQAE...TENHGGMLSSDHCGGLYPLPALPFGSCSGAA...ATAACG     | 86  |
|          | Consensus | mqaymeggqlsacpflvpdhyagfplplplqlpsqpnklfqmpfvvdqeaetenhggmlssdhcgglyplpalpfgscsgaaaatac                  |     |
|          | ScWRKY3   | CGKPTAGFMPSTIGAEVCTSVATKLGCSNESNSTWKGSAATT...AERGMKMKVRRKMRPRFCFQTRSDVDVLDGGYKWRKYGQK                    | 172 |
|          | OsWRKY12  | ICKHSAAGSMPTIGAEVCTSVATKLGCSNESNSTWKGSAATT...AERGMKMKVRRKMRPRFCFQTRSDVDVLDGGYKWRKYGQK                    | 175 |
|          | Consensus | cgkhsaaagfmpnaggaeevctsvatkgcnesnstwkgsaattiaergkmkvrkrmreprfcfqt rsdvldvlddgykwrkygqk                   |     |
|          | ScWRKY3   | VVKNSLHPRSFRCTHSNCRVKKRVERLSTDCRMVMTTYEGRHTHSPCSDDASSADHTDCFSS                                           | 235 |
|          | OsWRKY12  | VVKNSLHPRSFRCTHSNCRVKKRVERLSTDCRMVMTTYEGRHTHSPCSDDASSADHTDCFSS                                           | 237 |
|          | Consensus | vvknslhprsyfrcthsncrvkkvrerlstdcrmvmttyegrhthspcsddassadhtdcfssf                                         |     |
| <b>F</b> | ScWRKY3   | MQAYMEGGQLSACLPSFLVDPHYA...FPLPLPLQLPSQPNKLFQMPFV...NOE...TENHGGMLSSDHCGGLYPLPALPFGSCSGAA...ATAACG       | 89  |
|          | ScWRKY4   | ...MEGSSQLSACLPSFLVDPHYA...FPLPLPLQLPSSO...NKLQMPFV...DQAE...TENHGGMLSSDHCGGLYPLPALPFGSCSGAA...ATAACG    | 86  |
|          | Consensus | mqaymeggqlsacpflvpdhyagfplplplqlpsqpnklfqmpfvvneeaetenhggmlssdhcgggplpallifgicfcaaaapac                  |     |
|          | ScWRKY3   | GKPTAGFMPSTIGAEVCTSVATKLGCSNESNSTWKGSAATT...AERGMKMKVRRKMRPRFCFQTRSDVDVLDGGYKWRKYGQK                     | 170 |
|          | ScWRKY4   | CKPTTTTCFTALDAGACAGTSAKAAAEIASTTTTT...CNGPSCN...WKGSAATT...AERGMKMKVRRKMRPRFCFQTRSDVDVLDGGYKWRKYGQK      | 176 |
|          | Consensus | cekptagfmpsaigaeevctsvatklgcsnesnstwkgsaattiaergkmkvrkrmreprfcfqt rsdvldvlddgykwrkyg                     |     |
|          | ScWRKY3   | QKVVKNSLHPRSFRCTHSNCRVKKRVERLSTDCRMVMTTYEGRHTHSPCSDDASSADHTDCFSS                                         | 235 |
|          | ScWRKY4   | QKVVKNSLHPRSFRCTHSNCRVKKRVERLSTDCRMVMTTYEGRHTHSPCSDDASSADHTDCFSS                                         | 240 |
|          | Consensus | qkvvkslhprsyfrcthsncrvkkvrerlstdcrmvmttyegrhthspcsddassadhtdcfssf                                        |     |
| <b>G</b> | ScWRKY3   | MAASGLAHEACAA...MQAYMEGGQLSACLPSFLVDPHYA...FPLPLPLQLPSQPNKLFQMPFV...NOE...TENHGGMLSSDHCGGLYPLPALPFG      | 78  |
|          | Sc-WRKY   | MAASGLAHEACAA...MQAYMEGGQLSACLPSFLVDPHYA...FPLPLPLQLPSQPNKLFQMPFV...NOE...TENHGGMLSSDHCGGLYPLPALPFG      | 90  |
|          | Consensus | maasglahaeacaa...mqaymeggqlsacpflvpdhyagfplplplqlpsqpnklfqmpfvvneeaetenhggmlssdhcgggplpallifgicfcaaaapac |     |
|          | ScWRKY3   | SCSGAAAAATACCGKPTA...CFMPSAIGAEVCTSVATKLGCSNESNSTWKGSAATT...AERGMKMKVRRKMRPRFCFQTRSDVDVLDGGYK            | 166 |
|          | Sc-WRKY   | SADGRRR...LMS...PAGNGG...RPA...ST...IG...FRTRSDVDVLDGGYK                                                 | 133 |
|          | Consensus | sadgaaaalacggaggaggfmasaigaeevctsvatklgcsnesnstwkgsaattiaergkmkvrkrmreprfcfqt rsdvldvlddgyk              |     |
|          | ScWRKY3   | RKYGKAVKNSLHPRSFRCTHSNCRVKKRVERLSTDCRMVMTTYEGRHTHSPCSDDASSADHTDCFSS                                      | 236 |
|          | Sc-WRKY   | RKYGKAVKNSLHPRSFRCTHSNCRVKKRVERLSTDCRMVMTTYEGRHTHSPCSDDASSADHTDCFSS                                      | 223 |
|          | Consensus | rkygkavknslhprsyfrcthsncrvkkvrerlstdcrmvmttyegrhthspcsddassadhtdcfsspysassaplvaapswn                     |     |
|          | ScWRKY3   | AAFDAWKAQLHAAAHSSSSS                                                                                     | 236 |
|          | Sc-WRKY   | AAFDAWKAQLHAAAHSSSSS                                                                                     | 244 |
|          | Consensus | aafdawkaqlhaaaahssess                                                                                    |     |

**Figure S5.** Amino acid sequences alignment of ScWRKY3 and other WRKYs. A to G are showing the amino acid sequence alignment of ScWRKY3 and WRKY from *Sorghum bicolor* SbWRKY57 (XP\_002452824.2), *Miscanthus lutarioriparius* MIWRKY12 (AGQ46321.1), *Zea mays* ZmWRKY51 (XP\_020393361.1), *Setaria italica* SiWRKY12 (XP\_004953301.1), *Oryza sativa* OsWRKY12 (XP\_015624962.1), *Saccharum* ScWRKY4 (AUV50355.1) and Sc-WRKY (ACT53875.1), respectively. All these accession numbers in brackets are from GenBank. The black and blue colors indicate the homology level of conservation of the amino acid residues in the alignment at 100 and  $\geq 50$ , respectively.

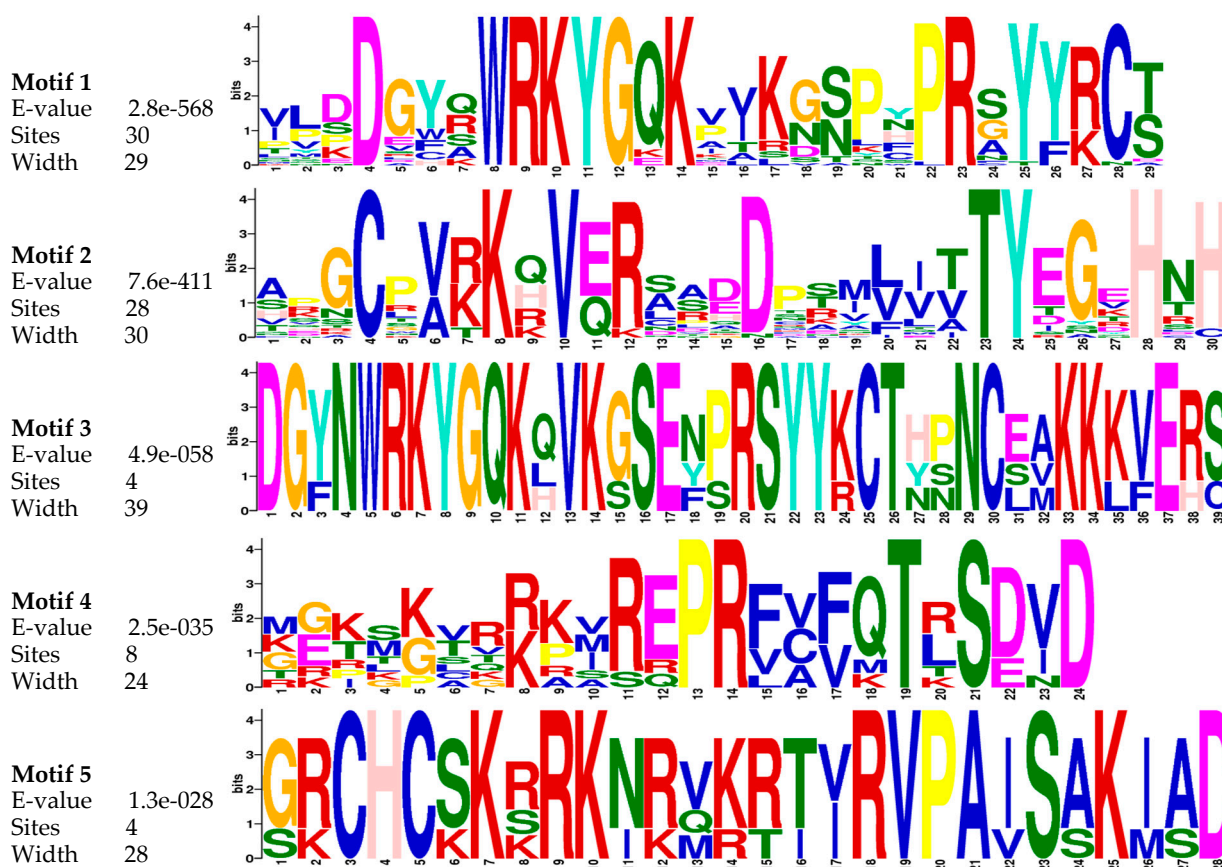

**Figure S6.** The logo of predicted conserved motifs in the WRKYs. The logos were predicted by the online software MEME Suite 5.0.2 (<http://meme.sdsc.edu/meme/intro.html>). On the y axis (measured in bits), the overall height of the stack indicating the sequence conservation at that position, while the height of symbols within the stack indicates the relative frequency of each amino acid at that position.
